# Supplementary material
Source: Springer Nature journal article supplement (https://www.springermedizin.de/resource/supplementary/12958_2011_854_MOESM5_ESM.pdf/9569002)

**A****Western Blot- Primary hEEC****Total lysates**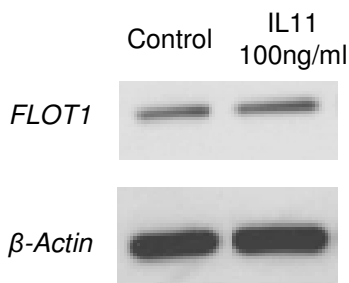**B****Western Blot- ECC-1 (Membrane Fraction)**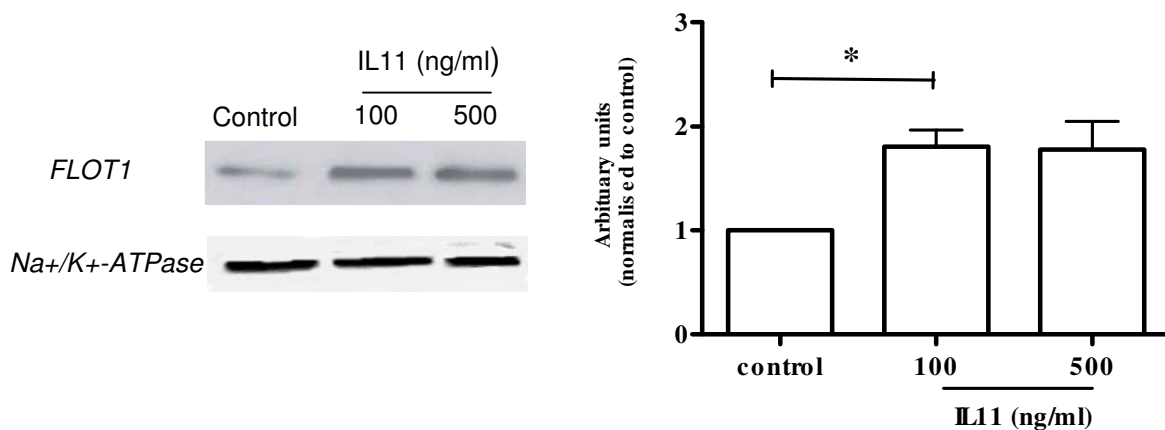**C****Western Blot- Ishikawa (Membrane Fraction)**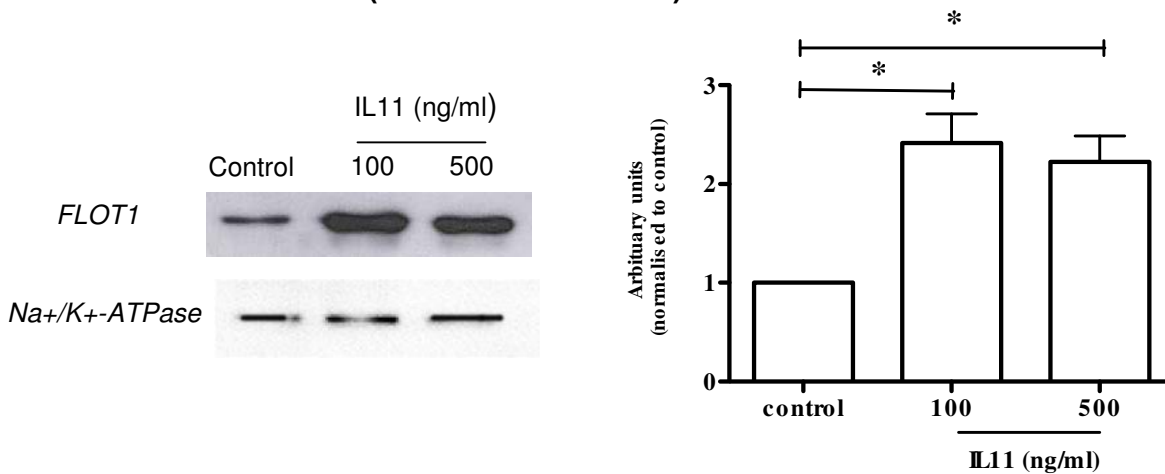

Supplement: MOESM5 [file 9569002]
